# Supplementary material
Source: PubMed Central journal article supplement (PMC3918344)

# Supplementary Figure 1

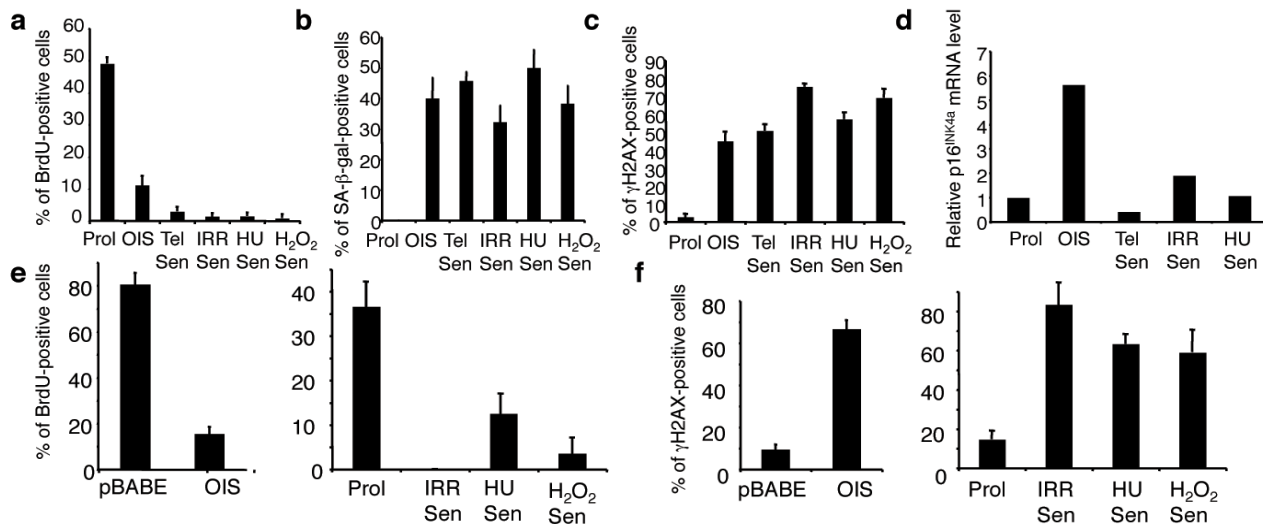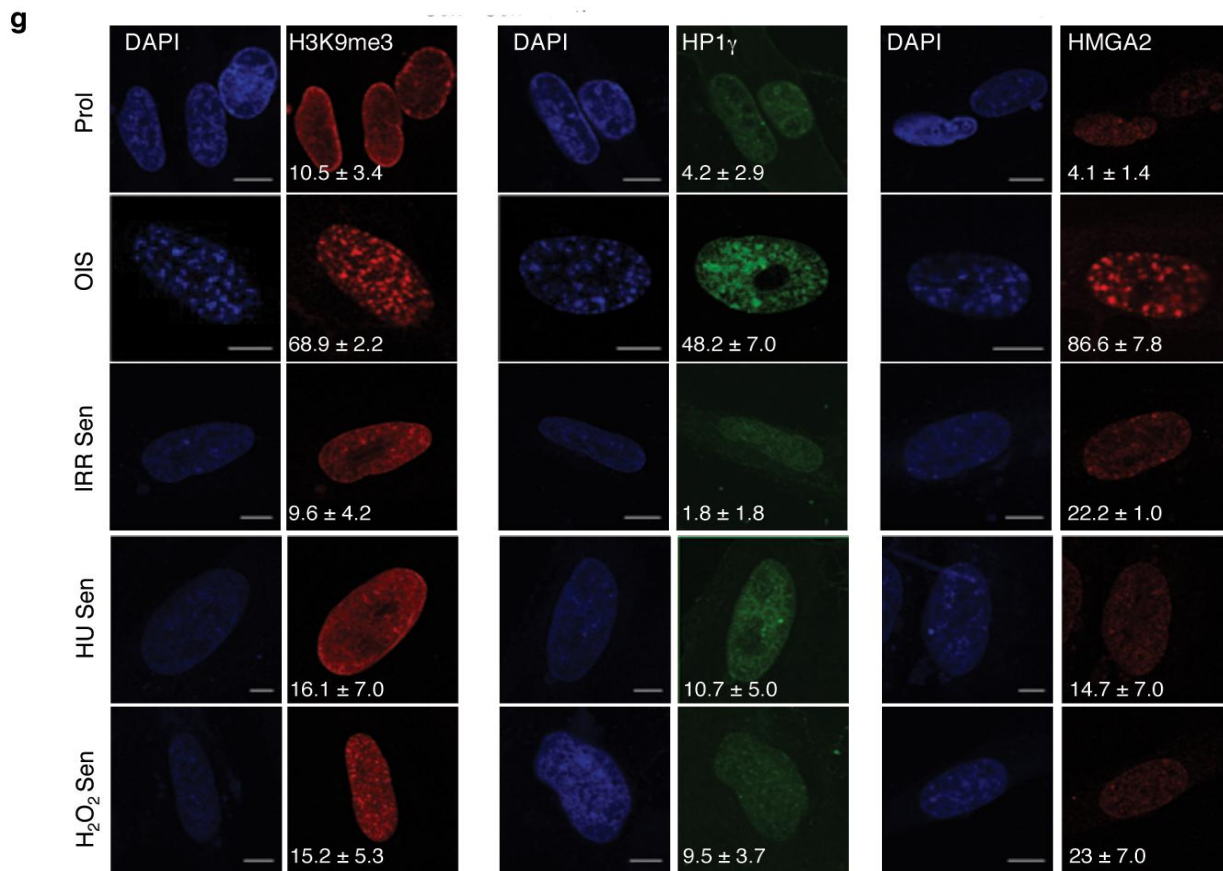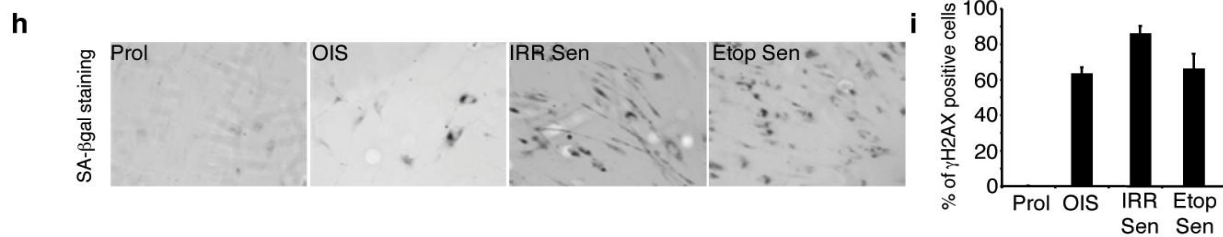

# Supplementary Figure 2

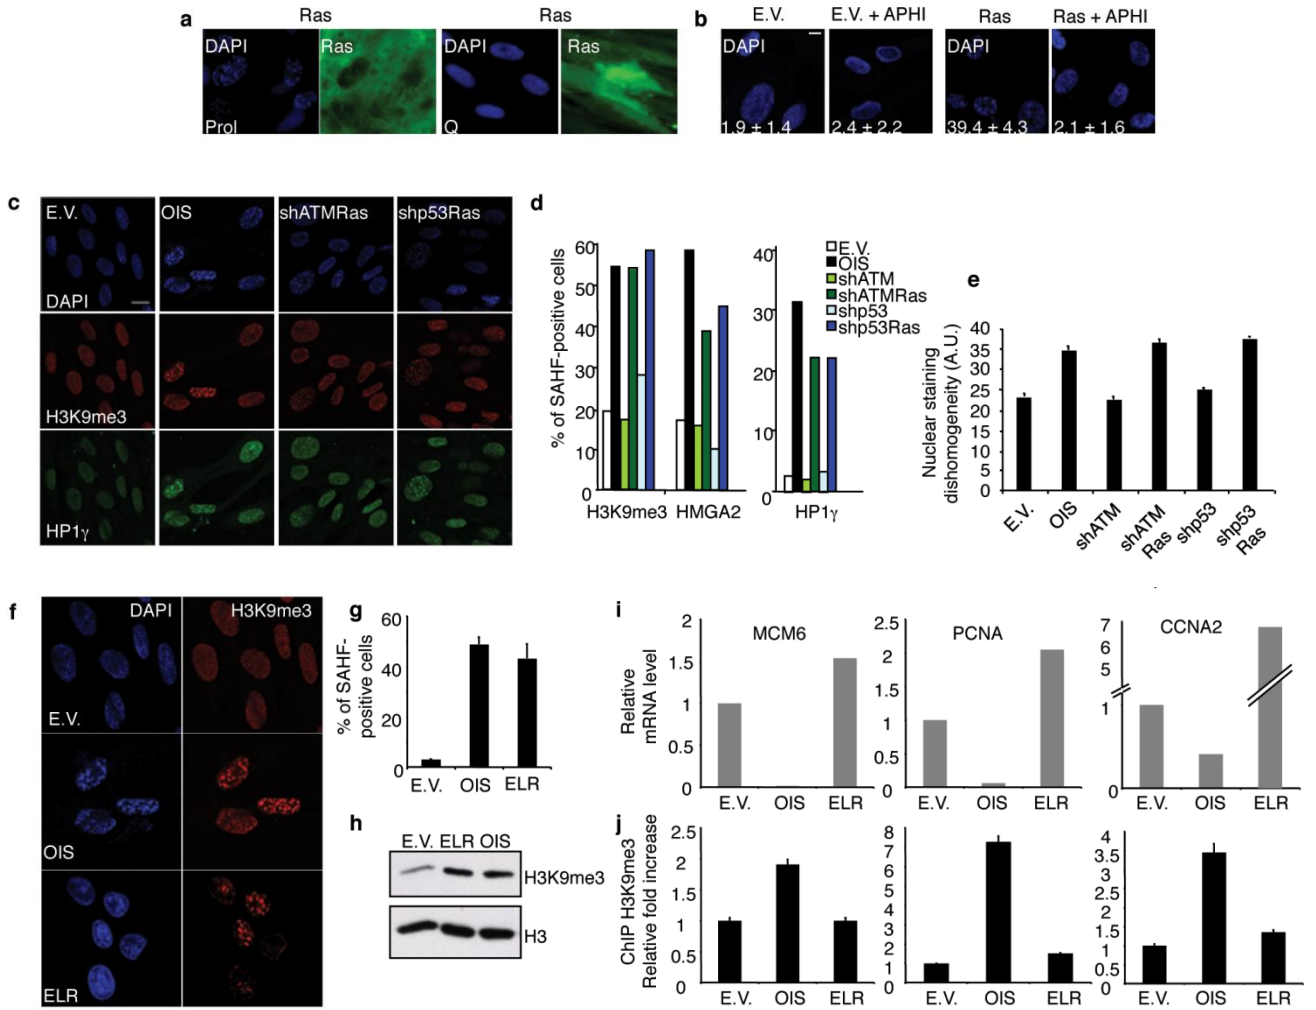

# Supplementary Figure 3

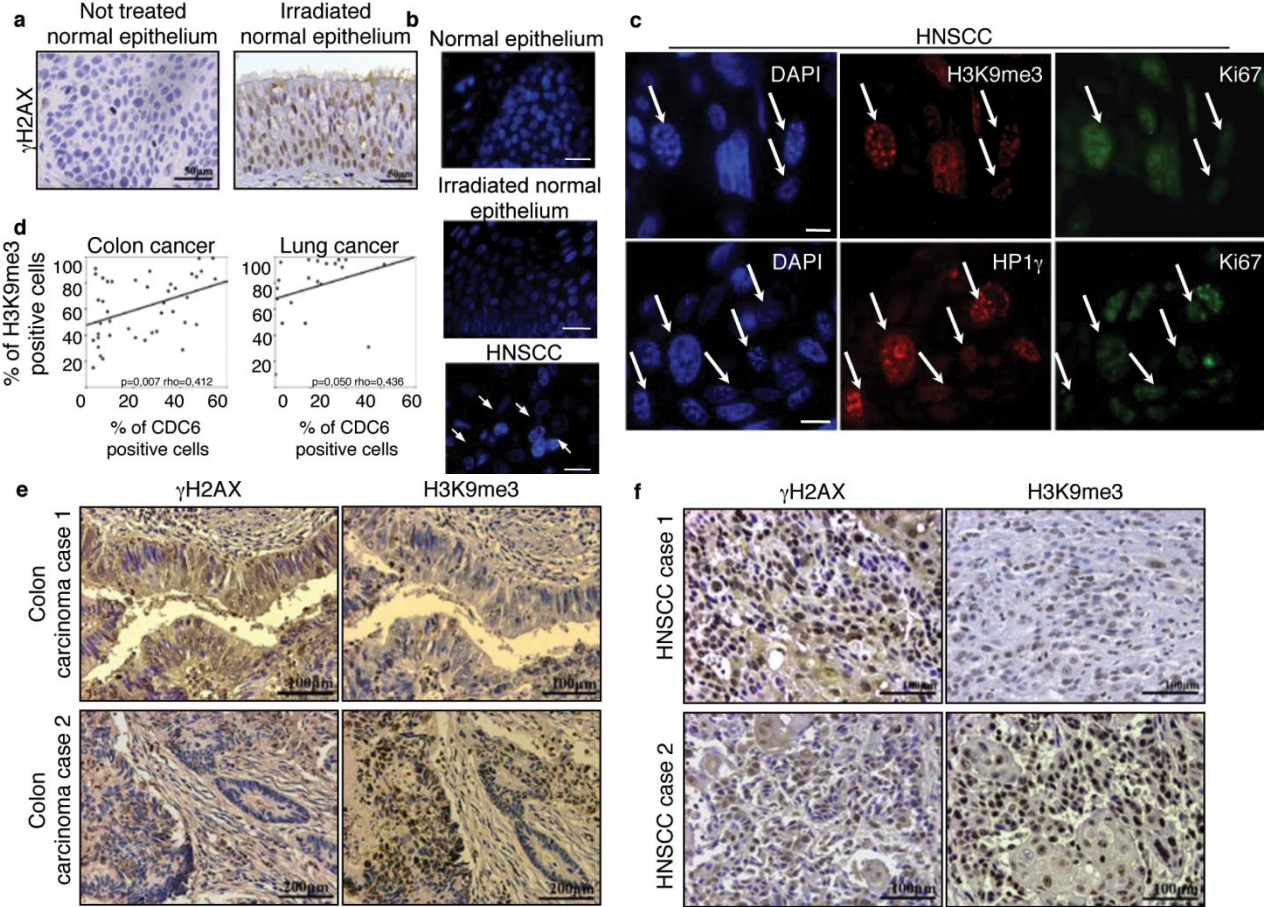

Supplementary Figure 4

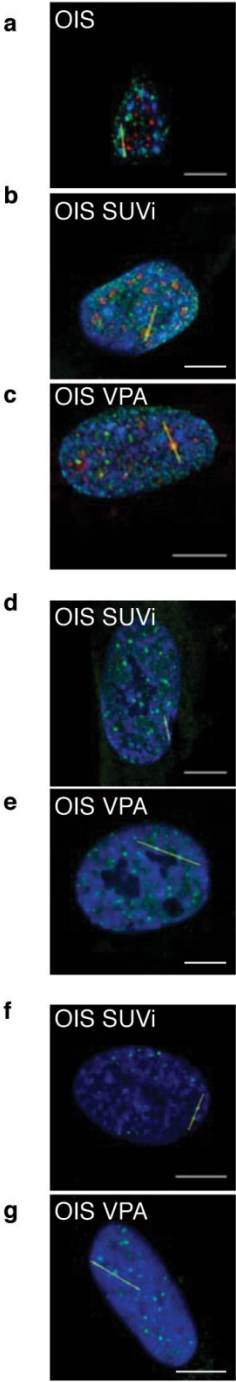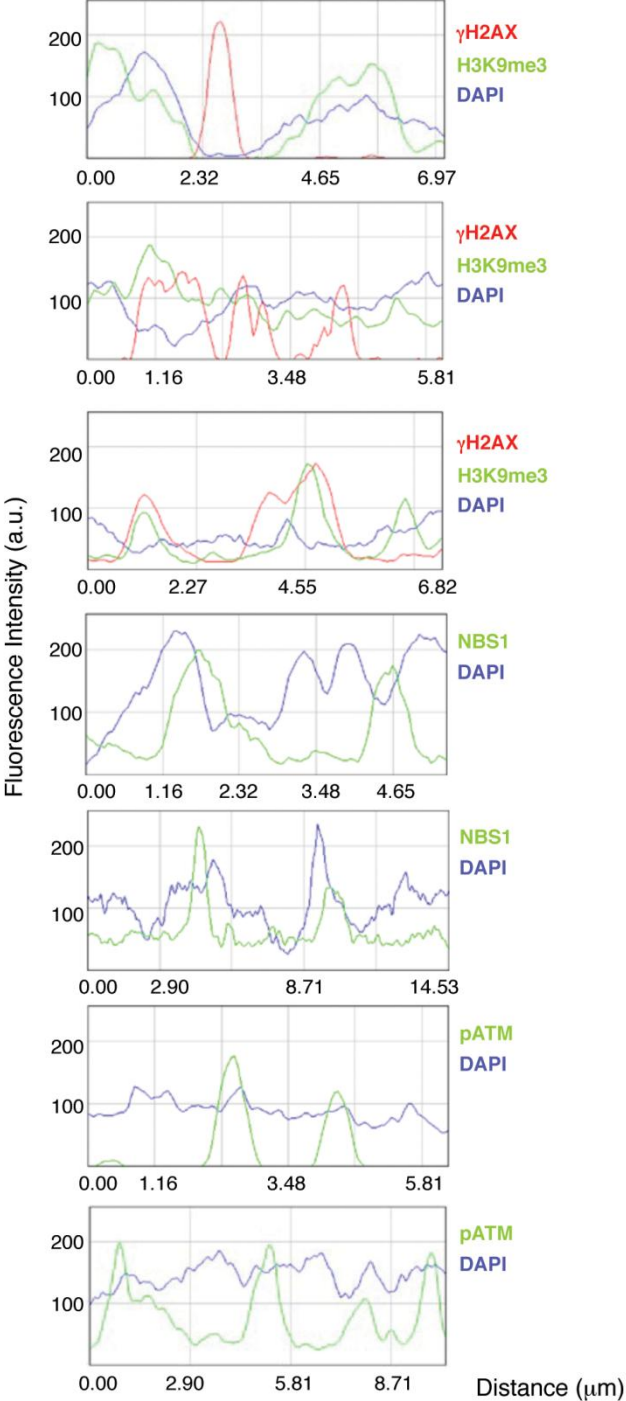



# Supplementary Figure 5

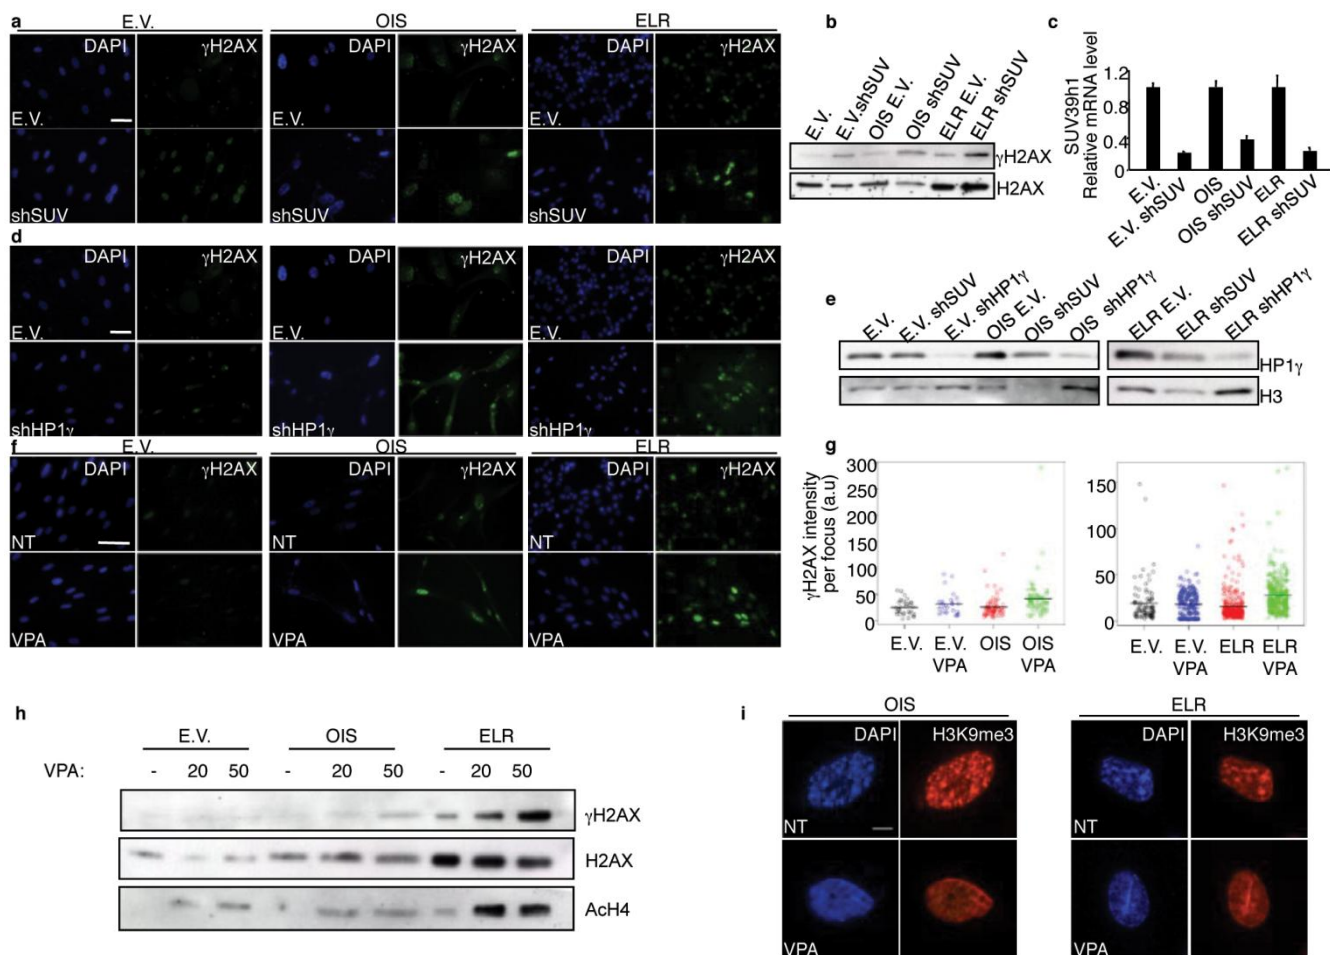

Supplementary Figure 6

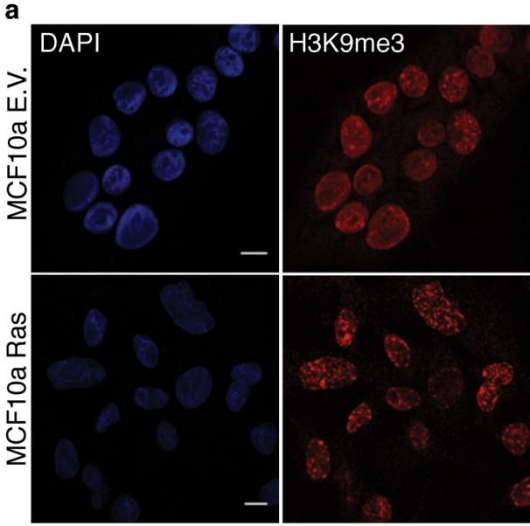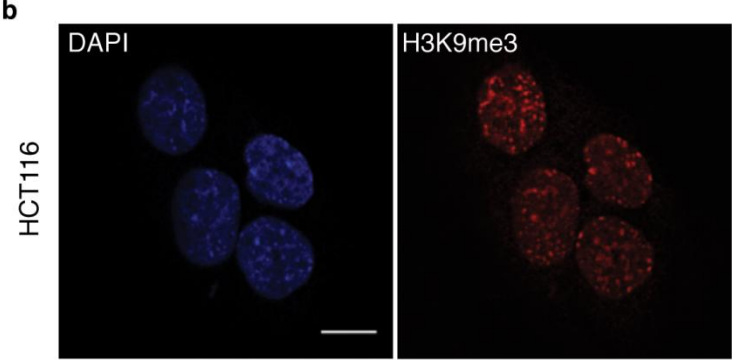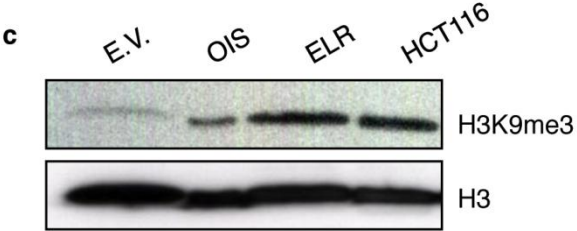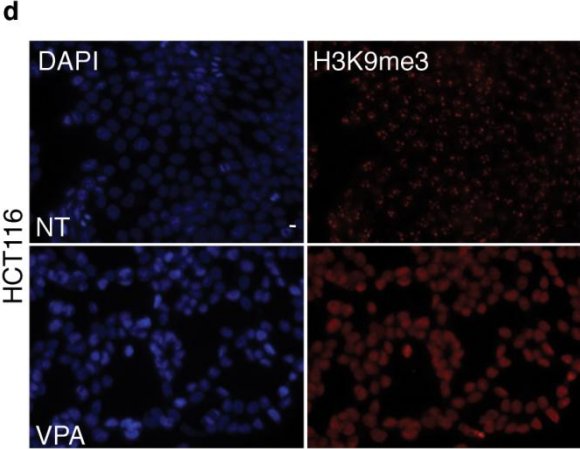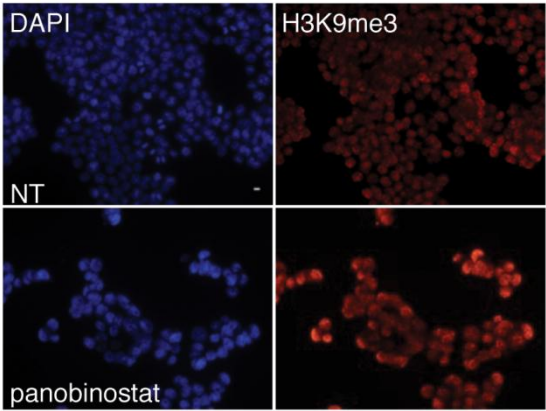

# Supplementary Figure 7

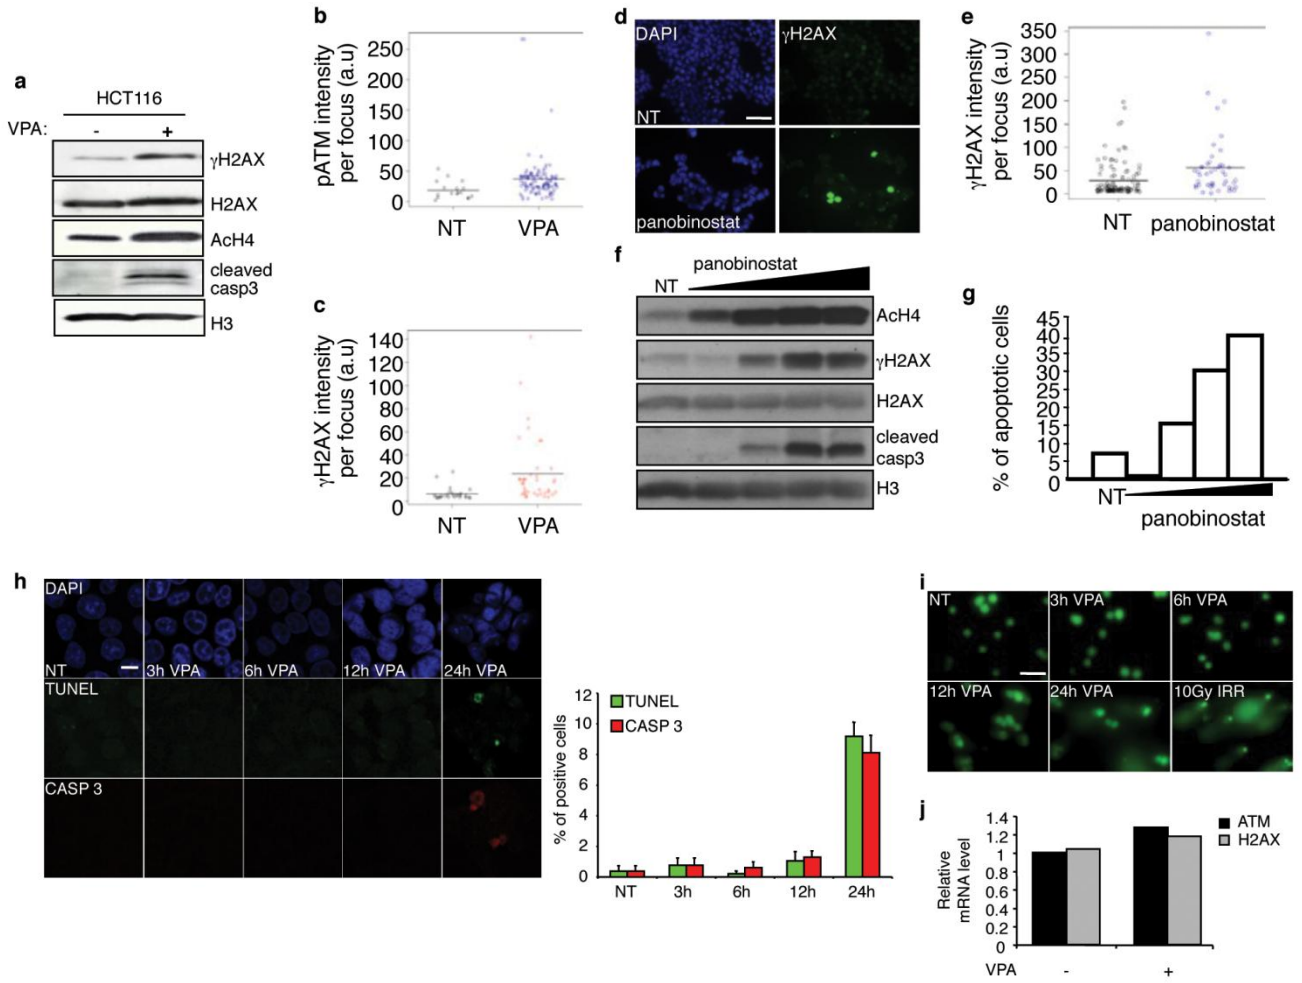

# Supplementary Figure 8

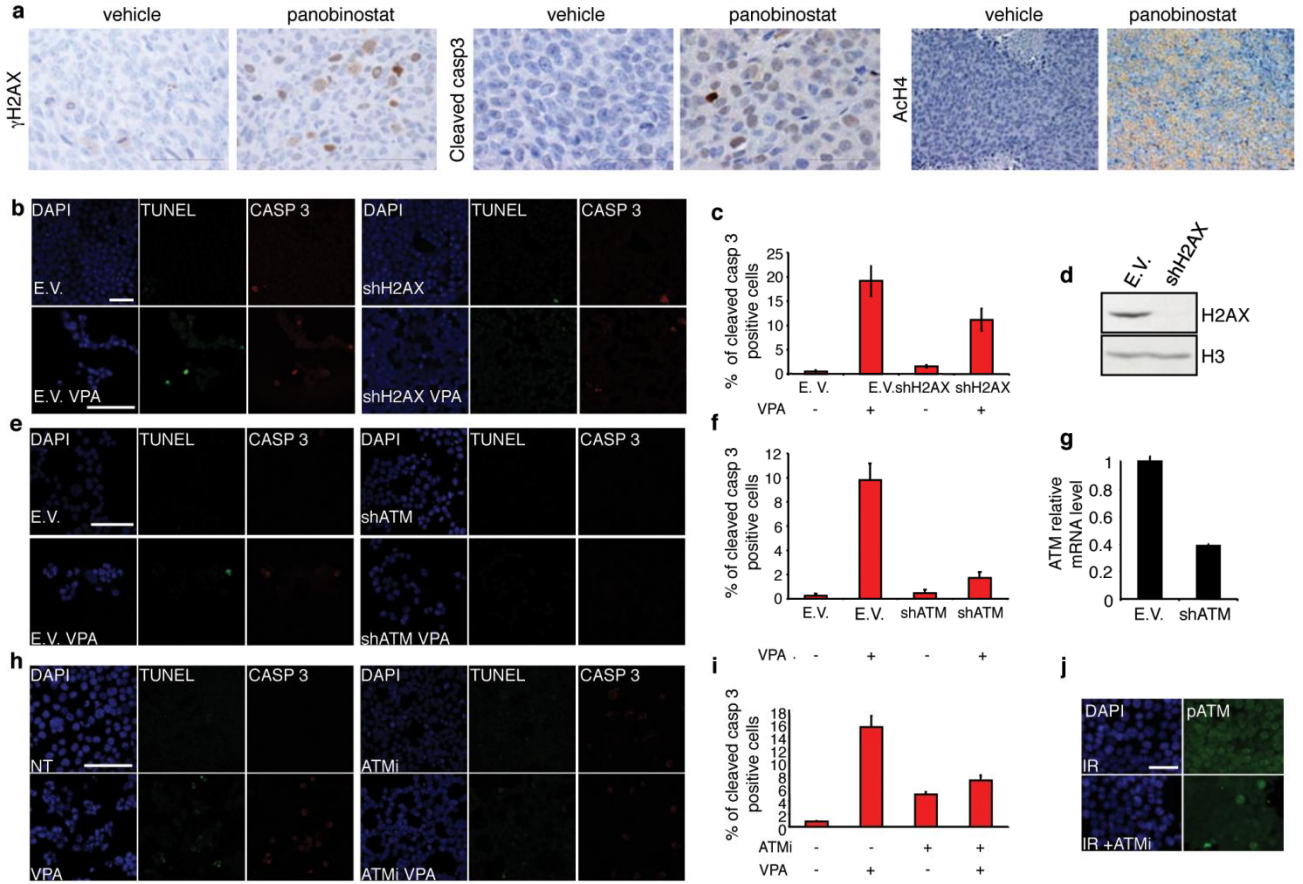



# Supplementary Figure 9

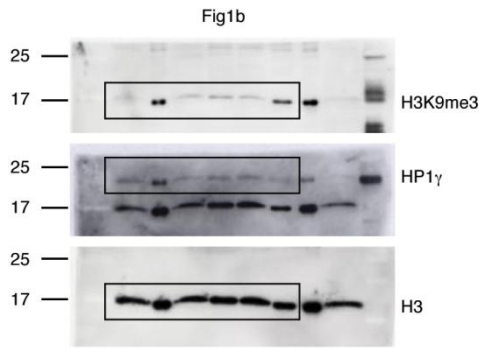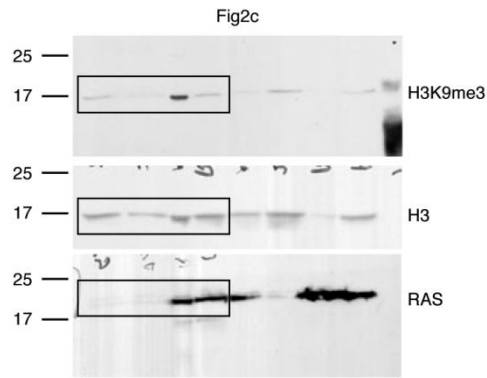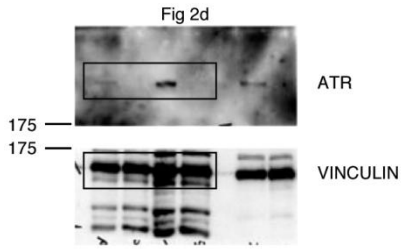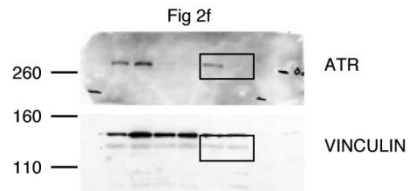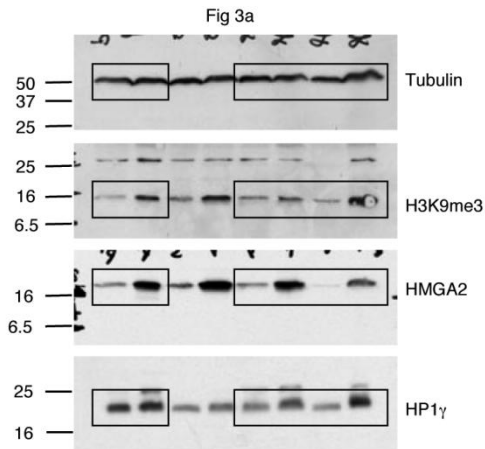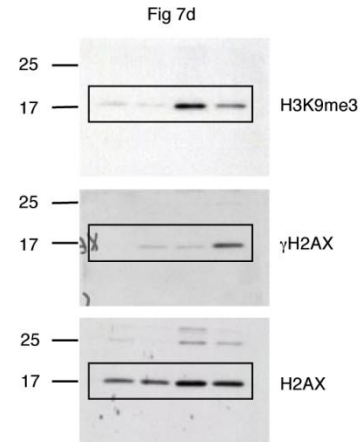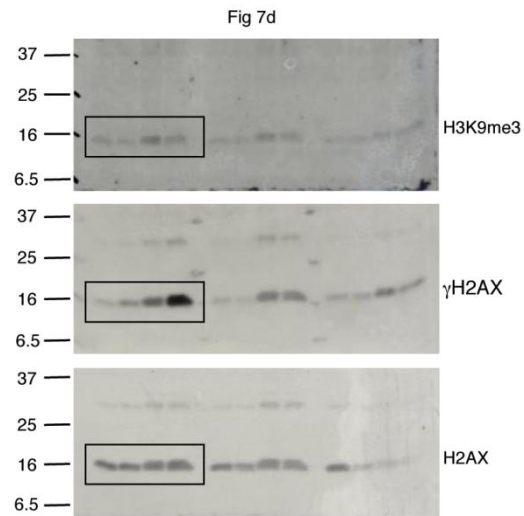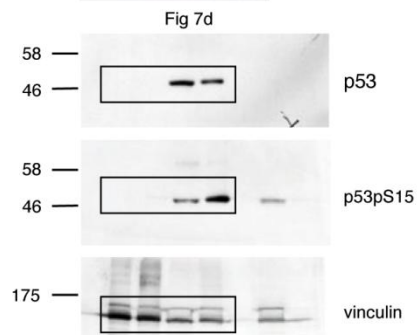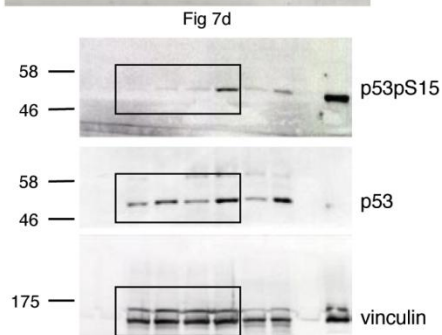

Supplementary Figure 9 continued

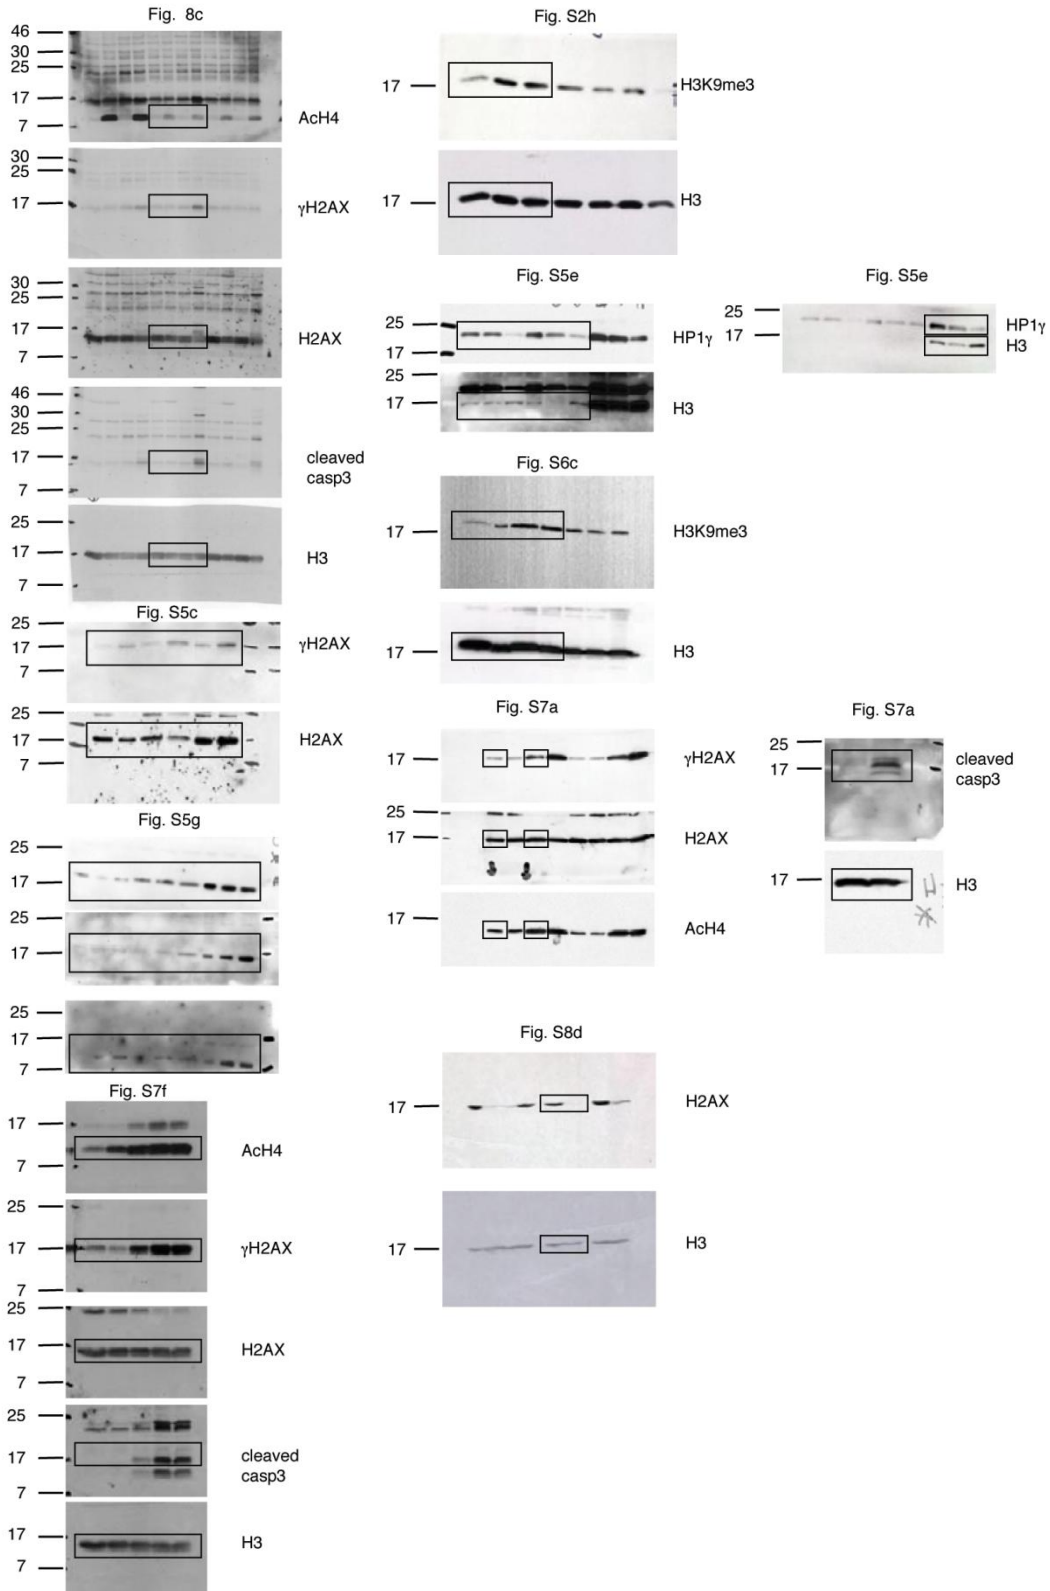

Supplement: NIHMS539567-supplement-Suppl_Figuresd.pdf [file NIHMS539567-supplement-Suppl_Figuresd.pdf]
